# Supplementary material for: Multi-scale temporal analysis of evaporation on a saline lake in the Atacama Desert
Source: Copernicus journal article supplement (doi:10.5194/hess-2022-20), 2022-02-11
Supplement: Supplementary file [file hess-2022-20-AC1-supplement.pdf]

## Reviewer #1

We thank the reviewer for his/her constructive comments and valuable contribution to our manuscript. Below, we answered the line-by-line comments in blue font and indicated if, how, and where we introduced changes in the revised manuscript in a colored font.

The manuscript entitled “Multi-scale temporal analysis of evaporation on a saline lake in the Atacama Desert” by Felipe Lobos-Roco, O. Hartogensis, F. Suárez, A. Huerta-Viso, I. Benedict, A. de la Fuente and J. Vilà-Guerau de Arellano explores the magnitude and driving processes of evaporation from the Salar del Huasco, an endorheic salt flat located on the Altiplano Plateau, on different temporal scales, combining local observations, ERA5 reanalysis and different model approaches. The authors show that drivers of evaporation change from sub-diurnal scale (wind turbulence), to seasonal (net radiation) and interannual scale (global temperature, ENSO). Further, the authors assessed the lake water balance, demonstrating that evaporation controls lake level changes and groundwater recharge is significant. The results of this study are of high significance for water resource management in the context of industrial use and climate change, as well as for protection of biodiversity. I would recommend moderate revisions to improve the presentation of the manuscript. Key issues need to be addressed as follows.

The authors precisely and clearly describe the performed experiments, datasets, calculations and obtained results. I acknowledge that the authors attempt to better guide the reader through the number of applied methods and obtained results by introductory paragraphs to each subsection. However, by this, many information are repeated several times, making the text lengthy. The information in these introductory paragraphs becomes most times already clear from the titles of the subsections. Thus, I suggest to remove these lines to make the text more concise and go straight to the point. I specify the respective lines below in the line-by-line comments. In general, the very detailed description and the number of applied analyses makes it, however, difficult for the reader to identify key messages. When revising the manuscript, the authors should check for redundancies of information and try to be more concise. The authors may also consider to separate results (including downscaling, variability of evaporation on sub-diurnal, seasonal and interannual scales, and precipitation moisture sources) from the discussion (comparison/discussion of driving processes of evaporation on different timescales, lake water balance, large-scale implications (see comment below)).

**Answer:** We made an effort to reduce redundancies in the text as suggested by the reviewer. The changes are detailed in the line-by-line reply below. However, we opted to keep the results and discussions in one single section. The discussion we follow focuses on one spatial or temporal scale at a time and we have little discussion points that cross scales. Splitting the results and discussions in separate sections would result in a discussion section with the same sub-sections for the temporal scales with potentially more redundancy.

The authors estimate the monthly water loss from the lake based on their evaporation estimates and lake area. Can the authors also estimate the amount of groundwater recharge based on the seasonal changes in the lake surface area and evaporation, and/or show if there is seasonal variability in the groundwater influx? Or is this beyond the limitations of the approach? As the precipitation amount is low and less variable in the autumn/winter months, the groundwater recharge may be estimated with sufficient precision. Also, the authors do not consider runoff from the catchment caused by precipitation, which may increase the contribution of precipitation (directly + indirectly) significantly. When taking runoff into account, may the amount of groundwater recharge necessary be reduced?

**Answer:** Our approach, was a first-order approximation on a decadal timescale that omits groundwater recharge values at shorter timescales. Our estimations agree in the order of magnitude with long-term river flow observations in the basin that are obtained just before the river completely infiltrates to then travel as groundwater into the basin's sink (e.g., see Uribe et al., 2015 or Blin et al., 2022). On seasonal timescales, calculating groundwater variability would bring high uncertainty since this groundwater

also contributes to other surfaces like wet-salt and wetlands, in which seasonal variability of evaporation is different from the one present on the lake. For these reasons, we believe that more precise information is needed to reproduce the seasonal variability of groundwater flow, and thus this is beyond the limitation of our current approach.

We do not consider runoff from the catchment because there has not been a surface connection between the runoff and the lake in recent decades. This behavior occurs due to the highly permeable soil in the lake surroundings that infiltrates all possible surface runoff. Therefore, the contribution of runoff is negligible.

**Action taken:** we have introduced the following sentences to clarify this doubts in the manuscript:

Line 223: "Because most of the time there are no surface water inputs (negligible surface runoff is observed)"

Line 225: "However, we believe that more precise information is needed to reproduce the seasonal variability of groundwater flow."

The discussion of the results in a broader context is limited. To which extent are the obtained results applicable to other salar systems in the Altiplano Plateau? Which implications have the increase in evaporation rate / decrease in precipitation for saline lakes in the Atacama Desert and water resource management in this region? I would acknowledge if the authors can add a short paragraph on this subject, at least as part of the outlook in the Conclusion.

**Answer:** we agree to add this discussion as a part of the outlook in the conclusions.

**Action taken:** we have modified the last paragraph of the conclusion adding this discussion as:

"Finally, our study gives a first multi-scale temporal approach to understand actual evaporation, its role in the water balance of the saline lakes of Atacama Desert, under a context of climate change. We demonstrate that long-term actual evaporation is estimated reliably through a simple approach that combines observations and reanalysis data. However, we acknowledge the need of longer-term actual evaporation measurements to reduce the 7% uncertainty that the site-adapted Penman equation brings. Our approach aims at improving water resources management in arid regions. To generalise our approach further research will be needed on the site-adapted Penman equation coefficients for other surfaces in the Atacama Desert (wet-salt, wetlands, and sparse vegetation lands), as well as other arid regions worldwide. Moreover, the interannual variability of evaporation-precipitation and moisture transport must be analysed using higher-spatial-resolution models that include better the local impacts related to the sharp topography and land-use changes, as well as the ENSO phenomenon. Last, our site-adapted Penman approach must be corroborated in basins and lakes with different spatial scales, topography, and locations. "

#### **Line-by-line comments:**

Line 31: "[...] within the Atacama Desert where rainfall provides a source of water for northern Chile" => sense of the phrase unclear; In the Atacama Desert, precipitation is generally scarce and groundwater, rather than precipitation, the major water source.

**Answer:** comment accepted.

**Action taken:** we have modified the sentence to: "The Altiplano region has a unique environmental, economic, and social value due to its location within the Atacama Desert, where groundwater fed a short, annual rain-period provides the main source of water for northern Chile"

Line 38 ff.: The authors refer here mainly to previous studies at the Salar del Huasco done by the authors of this study. However, there are a number of other studies in recent years at the Salar del Huasco, which investigated, for example, the groundwater regime (e.g. Johnson et al., 2010; Jayne et al., 2016; Scheihing et al., 2017), or the hydrological functioning of the salar (Voigt et al., 2021). The authors may consider to mention them too as the results of the present study are of major relevance for them.

**Answer:** comment accepted.

**Action taken:** we have added the suggested references to the Introduction (see colored track-and-trace changes in the ms).

Line 64/65: consider specifying the sentence to “This dependence of precipitation on climatic factors implies that [...]”.

**Answer:** comment accepted.

**Action taken:** we have modified the sentence as follows: “The ENSO influence on climatic factors such as precipitation implies that evaporation, as a temperature-dependent process, might also be affected by this phenomenon (Houston, 2006).”

Line 88-102: The first and the second half of this paragraph contain kind of similar information. I recommend to merge them to avoid redundancies.

**Answer:** comment accepted.

**Action taken:** We have removed the text from line 93 to 102, and modified it from line 88 to 93 as follows:

“In this study, we applied climatologically robust, downscaled reanalysis data to the saline lake of the Salar del Huasco. Although we focused on one particular saline lake, this kind of surface represents the main evaporation pathway of the Altiplano region (Houston, 2006). We hypothesized that the evaporation of the saline lake can be represented using an adapted version of the Penman (1948) equation. Confirmation of this hypothesis enables us to extend the adapted Penman model to the entire climatological period (1950-2020) and to investigate evaporation fluctuations and their drivers at seasonal and interannual scales.”

Line 107: With 135 km distance and ~4 km asl the Salar del Huasco is not really close to the ocean. It’s rather the ocean-land thermal contrast that forces the atmospheric flow from the Pacific to the Altiplano in the afternoon hours.

**Answer:** comment accepted.

**Action taken:** We have modified the sentence as follows: “This endorheic basin is located to the west of the Andes, 135 km inland from the Pacific Ocean, and is subject to an intense and recurrent afternoon atmospheric flow from the ocean that transports relatively cold and humid air into the Altiplano (Lobos-Roco et al., 2021)”.

Line 173: add that EC water takes measurements “above the saline lake” in contrast to met-station SDH , which takes measurements above bare soil.

**Answer:** comment accepted.

**Action taken:** the sentence was modified as follows: “The differences are related to the surfaces above which the instruments are installed, i.e. EC<sub>water</sub> above the saline lake and met-station<sub>SDH</sub> above bare soil (Fig. 1)”.

Line 187: As stated here, freezing is an important variable as it leads to a reduction of evaporation. It would be great if the authors can add some information on the periods of freezing at the Salar del Huasco and seasonal differences (e.g., how many days per season).

**Answer:** comment accepted.

**Action taken:** we have calculated the freezing periods and added this information to Appendix A4 (line 586-587) as: “For this reason, we use an ice coefficient,  $c_{ice}$ , which ranges between 0 and 1, depending on the number of freezing hours per day (Table 1). The days are taken from midday to midday to include the night. The idea is that ice produced over longer periods takes longer to melt. We assumed that freezing occurs when the 2 m air temperature is below 270 K, slightly below the freezing temperature of clean water to include the effect of salinity. Based on this criterion, freezing days are distributed over the year as 6% in summer, 21% in fall, 41% in winter, and 31% in spring.”

Line 203/204: May be combined with the first sentence of the paragraph to avoid redundancies.

**Answer:** comment accepted.

**Action taken:** we merged the sentence with the previous one as follows: “To get an overview of the moisture transport that results in precipitation over the Altiplano region and surrounding areas, we determine the moisture sources of a selected region spanning from 83° W to 57° E, and from 11° N to 27° S (Fig. 7).”

Line 210: suggestion: Seasonal averages of moisture sources are “evaluated” rather than “shown”

**Answer:** comment accepted.

**Action taken:** applied change as suggested

Line 212: suggestion: “long-term water balance” rather than “mass balance”

**Answer:** comment accepted.

**Action taken:** applied change as suggested

Line 216: The lake’s area estimates are obtained from de la Fuente et al. (2021)? Add reference.

**Answer:** comment accepted.

**Action taken:** the reference de la Fuente et al. (2021) has been added.

Line 227-232: I think this paragraph is redundant. There is no need for an introductory paragraph. The results obtained on i) diurnal, ii) seasonal, and iii) interannual scales are subsequently presented and become already clear from the titles of the subsections.

**Answer:** We understand the reviewer's concern about some redundancies throughout the manuscript, and we have accepted most of her/his suggestions on this issue. However, for this specific paragraph, we opted to keep it. We think that the paragraph introduces well how results and discussions are structured, which helps the reader to navigate through this long section.

**Action taken:** For reducing the text length we have shortened the introductory paragraph as follows: "This section describes the diurnal, seasonal, and interannual variability of evaporation at the saline lake of Salar del Huasco. First, we analyse the diurnal variability of evaporation through the site-adapted Penman equation. Secondly, we analyze the seasonal variations of evaporation, its main drivers, and the role of evaporation in the water balance of the saline lake. Finally, we close the article by studying the climatological trends of evaporation-precipitation and the influence of the ENSO and PDO phenomena on their anomalies."

Line 234-236: redundant. Go straight to the point. "Fig. 4 shows ..."

**Answer:** comment accepted.

**Action taken:** we have removed this paragraph.

Line 308: The authors highlight that local evaporation provides a significant moisture source for precipitation in the rainy season. Does this imply that evaporation forces precipitation, leading to the positive correlation between both (both high in austral summer, low in winter)? How may this be interpreted in terms of the anti-correlation between evaporation and precipitation observed on interannual scales?

**Answer:** The moisture tracking model is based on input data at coarse resolution (1.5°), which is unable to capture the local evaporation observations/estimations that occur under the localized conditions such as those at the Salar del Huasco. Indeed, the moisture sources analysis shows that during the rainy season (summer) there is an increased contribution from local evaporation to the total moisture due to increasing temperatures, radiation and soil moisture (rain season). It should be noted that an increase in moisture sources within the domain, does not necessarily mean that precipitation originates from evaporation in the same grid cell.

Also, during summer there is still moisture transport from outside the selected region, as can be seen in Figure 7. It is well-studied that moisture in summer is transported from the Amazon basin into the Altiplano region, and its correlation with ENSO is highly variable in space (Aceituno, 1988). Our intention using the tracking model was to reinforce the idea that local seasonal changes of evaporation are also observed at larger spatial scale. To further understand the exact correlation between evaporation, precipitation and moisture sources at the scale of the Salar del Huasco, we should apply moisture tracking model simulations on a finer grid.

In the conclusions section we state that higher-resolution models (compared to that used in this work) should be used to better understand the local impacts related to the sharp gradients in topography and land use.

**Action taken:** no action was taken

Line 368: In the sentences before, the authors argue against precipitation as the main driver of lake recharge. Thus, only groundwater should remain as an alternative explanation.

**Answer:** comment accepted.

**Action taken:** we modified line 368 as follow: “Thus, the alternative that explains lake recharge is groundwater, which is fed by precipitation in the headwaters of the basin.”

Line 386-388: As mentioned before, for me, there is no need for an introductory paragraph to each section. The authors may consider to remove these lines.

**Answer:** comment accepted.

**Action taken:** the paragraph has been removed.

Line 401/402: Redundant, see comment before. The authors may consider to remove these lines.

**Answer:** comment accepted.

**Action taken:** these lines have been removed.

Line 482/483: doubling the information that seasonal changes are dominated by radiation (mentioned in line 479/480).

**Answer:** comment accepted.

**Action taken:** we have modified the sentence at line 479/480 as follows: “In analyzing the budget of evaporation at the sub-diurnal scale, the wind speed (aerodynamic contribution) is the main driver of evaporation.”, and we have kept the sentence at lines 482/483.

Line 503-505: Consider to merge the two sentences.

**Answer:** We opted to keep these sentences separated to avoid very long and confusing sentences, but we rewrote the text for clarity

**Action taken:** We have modified the second sentence (line 504) as follows: “These correlations express that warm ENSO phases are characterized by higher evaporation rates and lower precipitation, whereas cool phases with lower evaporation and higher precipitation.”

Line 587: ice melting occurs when air temperatures are “above” 270K rather than “below”?

**Answer:** comment accepted.

**Action taken:** changed as suggested.
